# Supplementary material
Source: PubMed Central journal article supplement (PMC4375331)
Supplement: AEM.04153-14_zam999116196so1.pdf [file AEM.04153-14_zam999116196so1.pdf]

**Exploring the enantioselective mechanism of halohydrin dehalogenase from  
*Agrobacterium radiobacter* AD1 by iterative saturation mutagenesis**

Chao Guo, Yanpu Chen, Yu Zheng, Wei Zhang, Yunwen Tao, Juan Feng, and Lixia  
Tang<sup>#</sup>

School of Life Science and Technology, University of Electronic Science and  
Technology of China, Chengdu 610054, China

TABLE S1. Primers used in this study. All degenerate codons except for NNS were designed by using a free online software DC-Analyzer ([http://cobi.uestc.edu.cn/resource/dc\\_analyzer/view](http://cobi.uestc.edu.cn/resource/dc_analyzer/view)).

| Library           | Primer     | Primer Sequences                | XXX representation |
|-------------------|------------|---------------------------------|--------------------|
| A                 | F86_fw     | 5'-GCACCAGAGXXXCAACCCATAGAT-3'  | NDT, TGG, ATG, VMA |
|                   | L142_rv    | 5'-GTGTAGGTAGAXXXTTCCTTCCAAG-3' | AHN, CCA, CAT, TKB |
| B                 | T134_fw    | 5'-ACCTCTGCAXXXCCCTTCGGGCCTT-3' | NDT, TGG, ATG, VMA |
|                   | N176_rv    | 5'-CTGTGAAGATAXXXGGGTCCTATTG-3' | AHN, CCA, CAT, TKB |
| C                 | P84_fw     | 5'-TCGCAXXXGAGXXXCAACCCATAGA-3' | NNS                |
|                   | F86_rv     | 5'-ATGGGTTGXXXCTCXXXTGCGAATA-3' | SNN                |
| D                 | W139_fw    | 5'-TCGGGCCTXXXAAGGAACTTTCTAC-3' | NDT, TGG, ATG, VMA |
|                   | Y187_rv    | 5'-GGTTCTGTGGGXXXGAAGTAGGGAC-3' | AHN, CCA, CAT, TKB |
| E, F <sup>a</sup> | 134_ism_fw | 5'-ACCTCTGCAXXXCCCTTCGGGCCTT-3' | RYG, TGC           |
|                   | 176_ism_rv | 5'-CTGTGAAGATAXXXGGGTCCTATTG-3' | KTK, GRM           |
| G                 | 139_ism_fw | 5'-TCGGGCCTXXXAAGGAACTTTCTAC-3' | SHG, TGG, TAC      |

---

187\_ism\_rv 5'-GGTTCTGTGGGXXXGAAGTAGGGAC-3' GNR, KTC

---

<sup>a</sup> Libraries E and F were constructed using same primers but with different templates (see TABLE S2)

TABLE S2. Construction of combinatorial libraries for evolving enantiocomplementary HheC mutants.

| Libraries | Target positions            | Template <sup>a</sup>                           |
|-----------|-----------------------------|-------------------------------------------------|
| E (A + B) | F86/T134/L142/N176          | L142F, F86L/L142K, L142M, L142S                 |
| F (C + B) | P84/F86/T134/N176           | P84T/F86C, F86Y, P84A, P84V/F86P                |
| G (F + D) | P84/F86/T134/W139/N176/Y187 | P84V/F86P/T134C/N176A,<br>P84V/F86P/T134A/N176A |

<sup>a</sup> The plasmids of positive mutants obtained from first round mutagenesis were mixed with equal mole amount and used as a template for the construction of combinatorial libraries .

TABLE S3. Relative activity of selected positive mutants from CASTing libraries. All reactions were carried out using crude extracts of HheC mutants (0.06 mg) in 5 ml Tris-SO4 buffer (50 mM, pH 8.0) containing 5 mM 1, 3-dichloro-2-propanol.

| Libraries     | Mutants     | Relative Activity <sup>a</sup> |                 |
|---------------|-------------|--------------------------------|-----------------|
|               |             | Mutants                        | Mutants         |
|               |             | (%)                            | (%)             |
| A (F86/L142)  | L142Y       | 297                            | F86L/L142K 166  |
|               | L142M       | 168                            | L142S 134       |
|               | L142N       | 141                            | F86W 181        |
|               | L142F       | 425                            |                 |
| B (T134/N176) | T134C/N176Q | 200                            | T134E/N176F 189 |
|               | T134V/N176Q | 285                            | T134V 156       |
|               | T134A       | 100                            | N176A 103       |
|               | N176H       | 280                            |                 |
| C (P84/F86)   | P84T/F86C   | 183                            | F86Y 156        |
|               | P84I/F86P   | 196                            | F86W 176        |

|               |             |     |             |     |
|---------------|-------------|-----|-------------|-----|
|               | P84A/F86P   | 305 | P84V/F86P   | 270 |
|               | P84A        | 403 |             |     |
| D (W139/Y187) | W139Q/Y187E | 126 | W139Y       | 277 |
|               | W139V/Y187F | 262 | W139P       | 213 |
|               | W139G       | 23  | Y187R       | 188 |
|               | W139M       | 258 | W139V       | 291 |
|               | Y187P       | 133 | Y187C       | 152 |
|               | Y187F       | 318 | Y187S       | 118 |
|               | W139E       | 151 | W139A/Y187D | 167 |

---

<sup>a</sup> The activity of the wild-type HheC corresponding to 5.9 mol /min·mg was set as 100%.

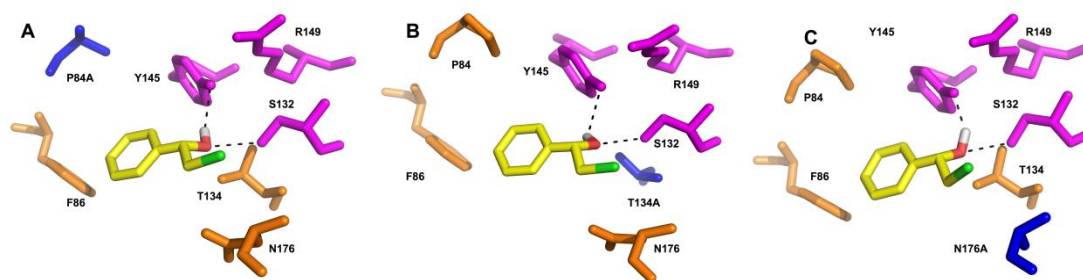

Figure S1. Representation of the structural models of mutants P84A (A), T134A (B) and N176A (C) with (*S*)-2-chloro-1-phenylethanol (2-CPE) docking at the active-site. The catalytic triad Ser132/Tyr145/Arg149 is shown in purple. The mutated residues are shown in blue. Hydrogen bonds are indicated as black dotted lines.

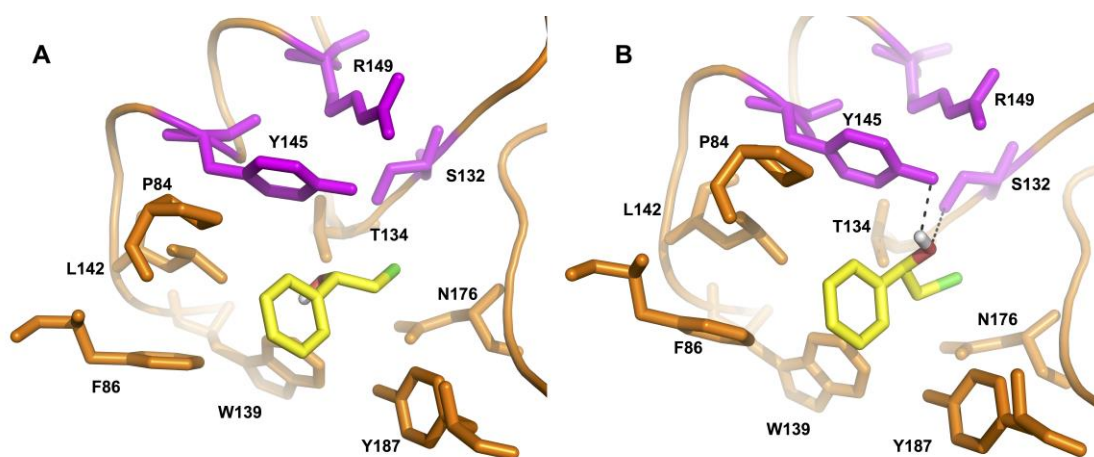

Figure S2. Representation of the binding modes of the enantiomers of 2-CPE in the active site of wild-type HheC. (A) (S)-2-CPE in the active site of HheC; (B) (R)-2-CPE in the active site of HheC. The catalytic triad Ser132/Tyr145/Arg149 is shown in purple. The other non-catalytic active-site residues are shown in orange. Hydrogen bonds are indicated as black dotted lines.



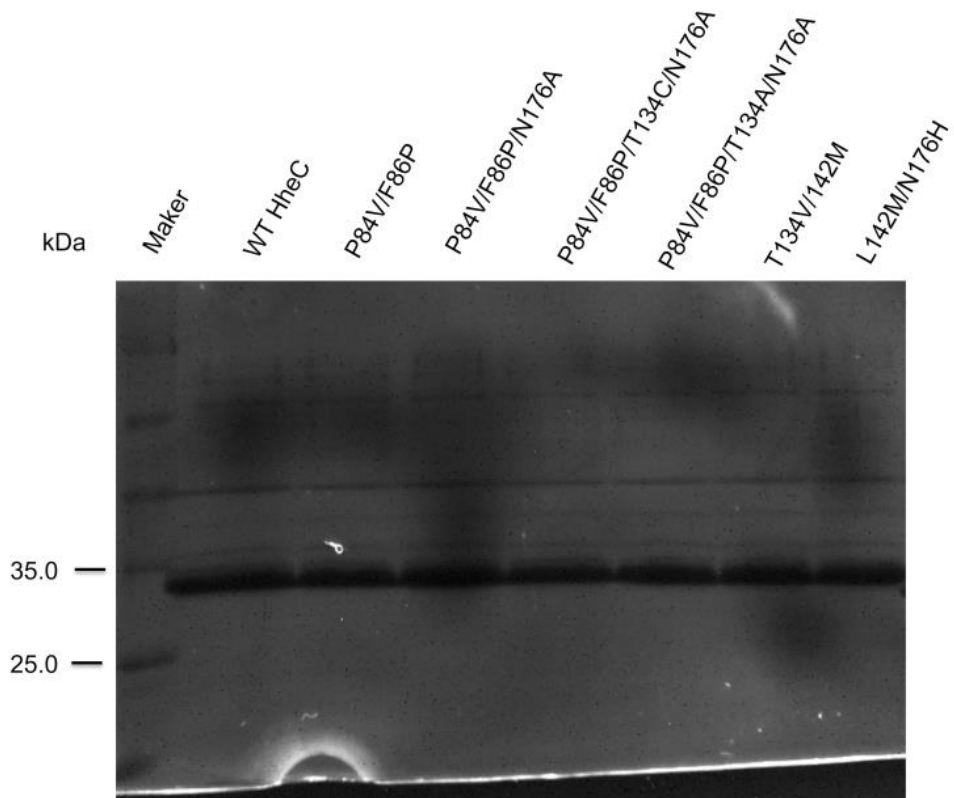

Figure S3. SDS-PAGE analysis of the purity of the wild-type HheC and its variants.

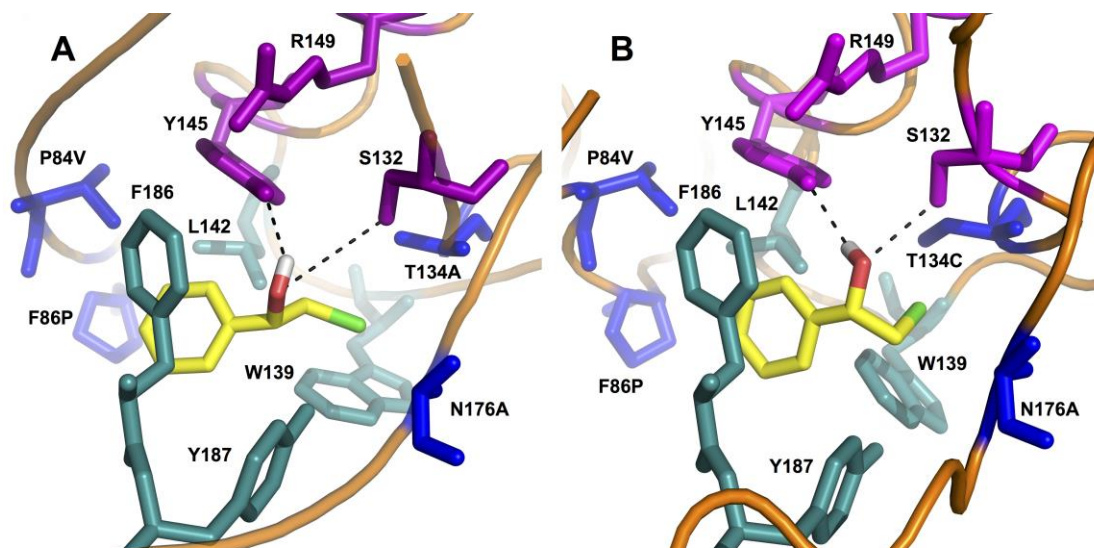

Figure S4. Representation of the structural models of two (*S*)-selective HheC mutants Pro84Val/Phen86Pro/Thr134Ala/Asn176Ala (A) and Pro84Val/Phen86Pro/Thr134Cys/Asn176Ala L142F/N176H (B) with (*S*)-2-CPE docked in the active site. The catalytic triad Ser132/Tyr145/Arg149 is shown in purple. The mutated residues are shown in blue. Hydrogen bonds are indicated as black dotted lines.
